# Supplementary material for: Oxidized cyclodextrin-functionalized injectable gelatin hydrogels as a new platform for tissue-adhesive hydrophobic drug delivery
Source: Royal Society of Chemistry journal article supplement (doi:10.1039/c7ra04137c), 2017-01-01
Supplement: c7ra04137c1.pdf [file c7ra04137c1.pdf]

## Electronic Supplementary Material (ESI) for RSC Advances

# Oxidized cyclodextrin-functionalized, injectable gelatin hydrogels as a new platform for tissue adhesive, hydrophobic drug delivery

### Supporting Information

Thai Thanh Hoang Thi<sup>†,a</sup>, Yunki Lee<sup>†,a,b</sup>, Seung Bae Ryu<sup>a</sup>, Hak-Joon Sung<sup>b,c</sup>, Ki Dong Park<sup>\*,a</sup>

---

<sup>a</sup> Department of Molecular Science and Technology, Ajou University, Suwon 443-749, Republic of Korea.

<sup>b</sup> Department of Biomedical Engineering, Vanderbilt University, Nashville, TN, 37235, USA.

<sup>c</sup> Severance Biomedical Science Institute, College of Medicine, Yonsei University, Seoul 120-751, Republic of Korea

<sup>†</sup> Thai Thanh Hoang Thi and Yunki Lee are the co-first authors.

\* Corresponding author, E-mail: kdp@ajou.ac.kr

## Ninhydrin assay

Ninhydrin assay was used to determine the amine content of GTA polymer. Ninhydrin reagent solution was prepared by dissolving 0.35 g ninhydrin in 100 mL isopropanol. GTA solution was prepared at the concentration of 1 mg/mL. Ninhydrin and GTA solution were mixed together at the volume ratio of 1/1, and reacted at 80 – 100 °C for 15 minutes. After cooling to room temperature, the absorbance was recorded with a spectrophotometer (Jasco V-670) at a wavelength of 570 nm. The amine content was calculated using the standard curve of glycine.

To determine the amine residues of GTA and GTA- $\alpha\beta$ -CD hydrogels, ninhydrin reagent was used. The hydrogels (200  $\mu$ L) were ground and added into the glass vials. These samples were dispersed into DIW of 1 mL, then sonication was applied for 30 minutes. Ninhydrin solution (1 mL) was added into the samples and the mixture was reacted at 80 – 100 °C for 15 minutes. When the solid components in ninhydrin solution turned purple, the color intensity indicated the level of amine residues in the hydrogels.

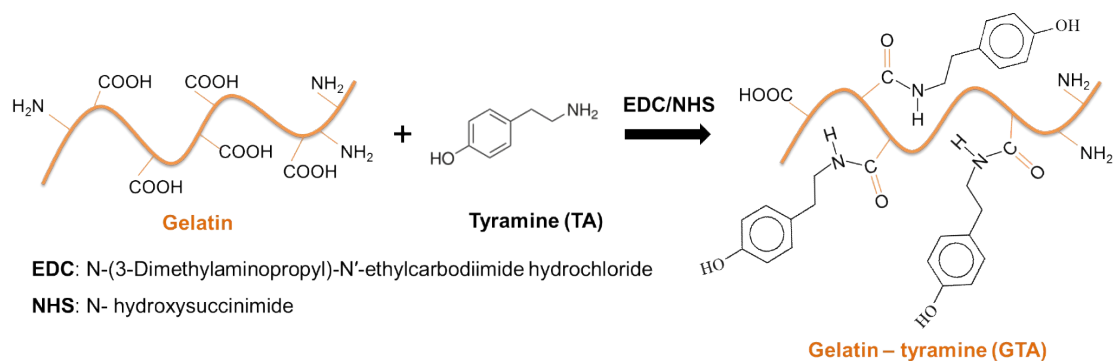

**Fig. S1** Synthesis scheme of gelatin-tyramine (GTA).

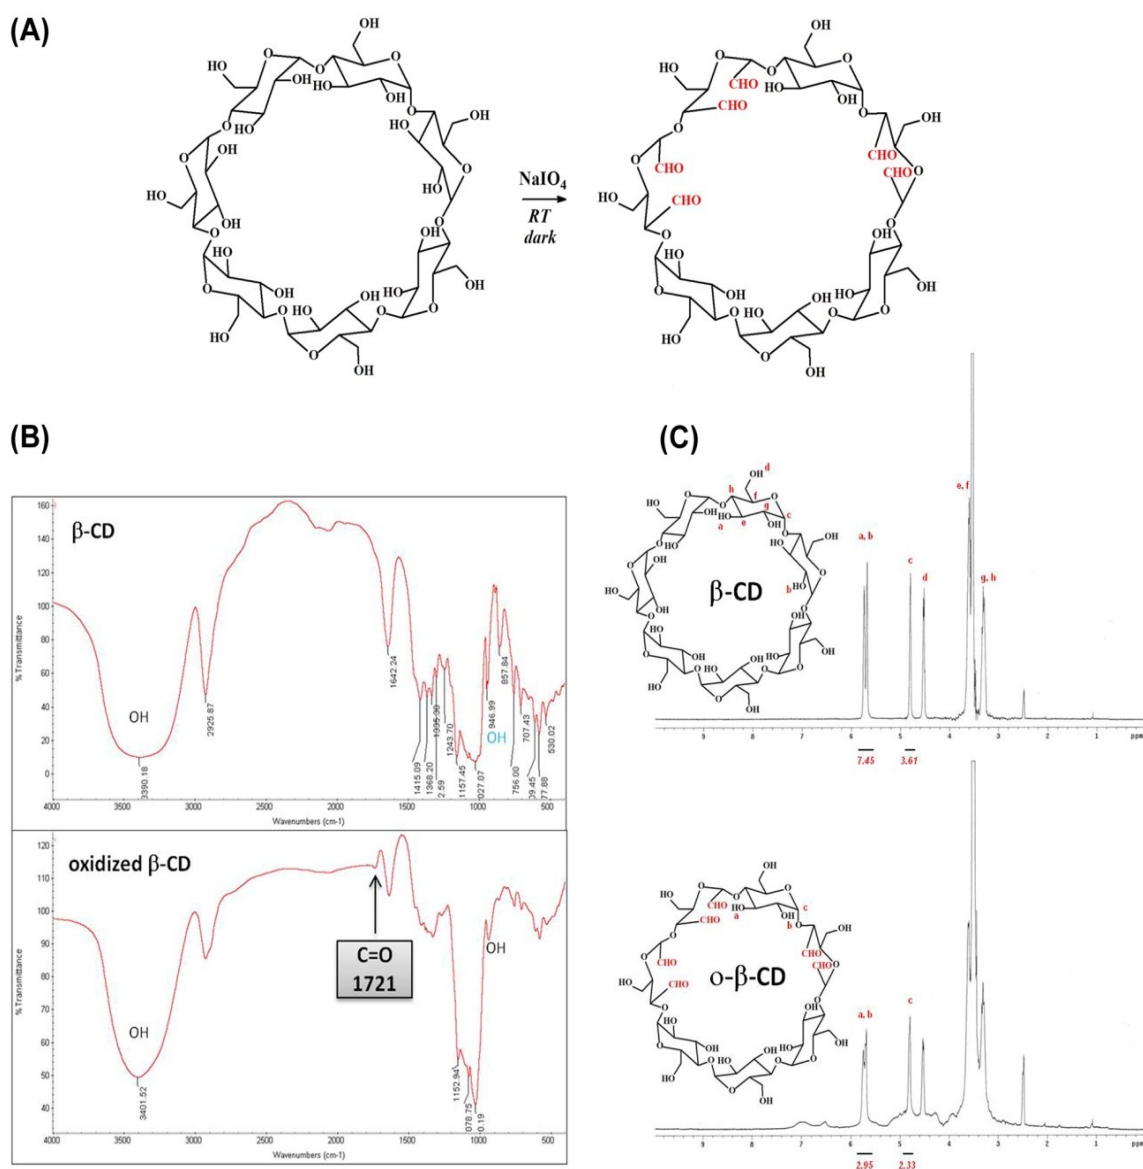

**Fig. S2** Oxidation of vicinal diol groups on  $\beta$ -CD using sodium periodate (A). IR of  $\beta$ -CD and oxidized  $\beta$ -CD ( $\alpha\beta$ -CD),  $\alpha\beta$ -CD shows a peak at 1721 nm, confirming the presence of aldehyde groups (B).  $^1\text{H}$  NMR of  $\beta$ -CD and oxidized  $\beta$ -CD in  $\text{DMSO-d}_6$  showing the integral ratio between a peak at  $\delta = 5.68 - 5.74$  (H of secondary hydroxyl groups symbolized as a and b on the Fig.) and  $\delta = 4.79$  (H of  $-\text{CH}-$  at the c position as marked on the Fig.) was decreased after oxidation (C).

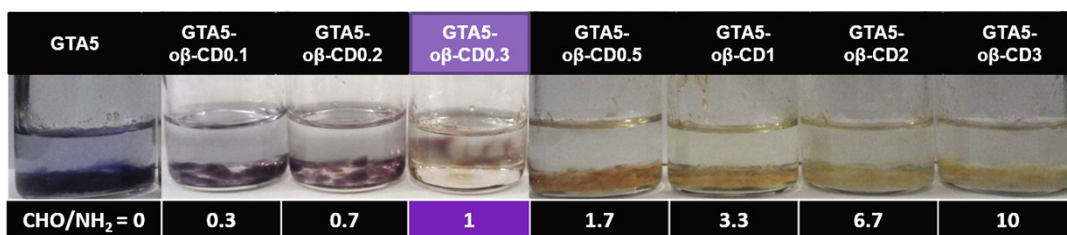

**Fig. S3** Photo images of hydrogels after dyeing with the ninhydrin reagent. The purple sample shows the remaining amine groups in the hydrogel matrix, and vice versa. The hydrogels were fabricated using 5 μg/mL HRP and 0.03% H<sub>2</sub>O<sub>2</sub> at room temperature, and stabilized for 30 min before adding the ninhydrin reagent.

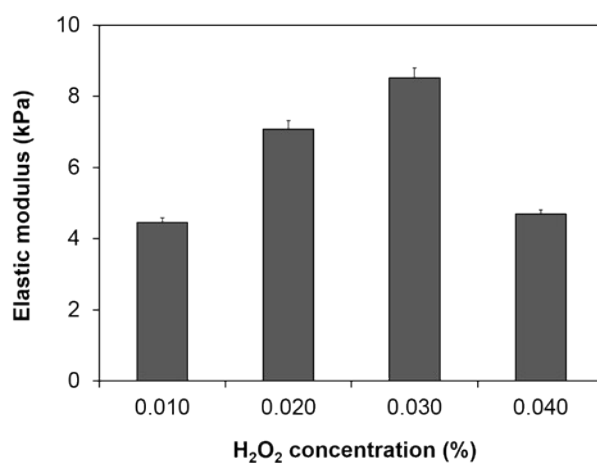

**Fig. S4** Elastic moduli of GTA5-oβ-CD1 hydrogels as a function of H<sub>2</sub>O<sub>2</sub> concentration

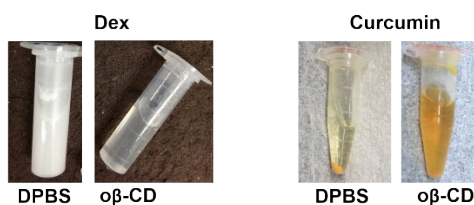

**Fig. S5** Solubility of Dex and curcumin in DPBS and 6 wt% oβ-CD solution at room temperature
